# Supplementary material for: The Effect of Gene Editing by CRISPR-Cas9 of miR-21 and the Indirect Target MMP9 in Metastatic Prostate Cancer
Source: MDPI journal article supplement (doi:10.3390/ijms241914847), 2023-10-03

Supplementary Figure S1. The PC-3 and DU145 cell lines were certified.

DTAPEP

BIOTÉRIO CENTRAL

DTAPEP

Diretoria Técnica de Apoio ao Ensino e Pesquisa

MEDICINA

USP

AUTENTICAÇÃO DE LINHAGENS

Laudo do Perfil de STR's / STR Profile Report

INFORMAÇÃO DO CLIENTE / CUSTOMER INFORMATION

|                           |                      |
|---------------------------|----------------------|
| Nome / Name               | IRAN AMORIM DA SILVA |
| Instituição / Institution | HCFMUSP              |
| Departamento / Department | CIRURGIA             |
| Telefone / Phone          | 1130617183           |
| E-mail                    | iransilve@gmail.com  |

|                                   |                     |
|-----------------------------------|---------------------|
| Nome da Linhagem / Cell line name | PC3 (ATCC CRL-1435) |
|-----------------------------------|---------------------|

|                                                      |                                         |
|------------------------------------------------------|-----------------------------------------|
| Amostra recebida em / Samples received in 00-00-0000 | Data do laudo / Report date: 16-12-2019 |
|------------------------------------------------------|-----------------------------------------|

| Loci                                                                                                                                          | Resultado do Teste / Test Result<br>(amostra/sample) |    |  |  | Perfil da referência no Banco de Dados / Reference Database Profile |    |  |     |
|-----------------------------------------------------------------------------------------------------------------------------------------------|------------------------------------------------------|----|--|--|---------------------------------------------------------------------|----|--|-----|
|                                                                                                                                               | Perfil da Amostra / Query Profile<br>PC3             |    |  |  | Perfil da referência / Database Profile<br>PC3 (ATCC CRL-1435)      |    |  |     |
| TH01                                                                                                                                          | 6                                                    | 7  |  |  | 6                                                                   | 7  |  |     |
| TPOX                                                                                                                                          | 8                                                    | 9  |  |  | 8                                                                   | 9  |  |     |
| vWA                                                                                                                                           | 17                                                   |    |  |  | 17                                                                  |    |  |     |
| CSF1PO                                                                                                                                        | 11                                                   |    |  |  | 11                                                                  |    |  |     |
| D16S539                                                                                                                                       | 11                                                   |    |  |  | 11                                                                  |    |  |     |
| D7S820                                                                                                                                        | 8                                                    | 11 |  |  | 8                                                                   | 11 |  |     |
| D13S317                                                                                                                                       | 11                                                   |    |  |  | 11                                                                  |    |  |     |
| D5S818                                                                                                                                        | 13                                                   |    |  |  | 13                                                                  |    |  |     |
| D21S11                                                                                                                                        |                                                      |    |  |  |                                                                     |    |  |     |
| Amelogenin                                                                                                                                    | x                                                    |    |  |  | x                                                                   |    |  |     |
| Número de alelos iguais entre a amostra e referência / Number of shared alleles between query sample and database profile:                    |                                                      |    |  |  |                                                                     |    |  | 12  |
| Total de alelos na amostra referência / Total number of alleles in the database profile:                                                      |                                                      |    |  |  |                                                                     |    |  | 12  |
| Porcentagem de correspondência entre alelos da amostra e da referência / Percent match between the submitted sample and the database profile: |                                                      |    |  |  |                                                                     |    |  | 100 |

RESULTADO / RESULT

Linhagens celulares com uma porcentagem de correspondência >=80% são consideradas relacionadas, ou seja, derivada de um ancestral comum. Linhagens com porcentagem de correspondência entre 55% e 80% necessitam de novos testes (maior número de marcadores) para confirmar sua autenticidade. / Cell lines with >=80% match are considered to be related; i.e., derived from a common ancestry. Cell lines with between a 55% to 80% match require further profiling for authentication of relatedness. (ATCC - STR Profile Report)

METODOLOGIA / METHODOLOGY

10 STR's, correspondendo aos loci TH01, TPOX, vWA, CSF1PO, D16S539, D7S820, D13S317, D5S818, Amelogenin e D21S11 (GenePrint 10 / Promega), foram amplificados e submetidos à eletroforese capilar para separação dos fragmentos (3730 DNA Analyzer - Applied Biosystems). Os dados foram analisados através do software XXX GeneMaker HDI v.1.1.0 (Softgenetics LCC). Controles positivos e negativos apropriados foram utilizados na validação de cada amostra. / 10 STR's (TH01, TPOX, vWA, CSF1PO, D16S539, D7S820, D13S317, D5S818, Amelogenin and D21S1- GenePrint 10 / Promega) are co-amplified and submitted to capillary electrophoresis (3730 DNA Analyzer - Applied Biosystems). An internal lane standard (ILS) and allelic ladder are provided for sizing and genotyping of amplified fragments, and the 2800M Control DNA is supplied as a positive control (GenePrint 10 / Promega). Data is analyzed using software GeneMaker HDI v.1.1.0 (Softgenetics LCC).

INTERPRETAÇÃO DOS DADOS / INTERPRETATION OF DATA

Os resultados foram interpretados segundo as diretrizes do ANSI Standards 2011 (ASN-0002 / ATCC Standards Development Organization) / Results were interpreted as described in ANSI Standards 2011 (ASN-0002 / ATCC Standards Development Organization / ATCC STR Profile Report)

☐

A linhagem enviada para análise é de origem humana, mas o seu perfil não corresponde a nenhuma linhagem padrão presente nos bancos de dados analisados / The submitted sample profile is of human origin, but not a match for any profile in the STR database

☒

A linhagem enviada para análise corresponde exatamente à seguinte linhagem celular humana / The submitted profile is an exact match for the following human cell lines):  
PC-3 Prostate Adenocarcinoma Human (ATCC:CRL-1435)

☐

O perfil de marcadores da linhagem enviada é similar à(s) seguinte(s) linhagem(s) celular(es) humana(s) / The submitted profile is similar to the following ATCC human cell line(s):

OBSERVAÇÕES / Additional Comments

https://www.atcc.org/en/STR\_Database.aspx

Responsável Técnico: Christian Albert Merkel

Email: c.merkel@fm.usp.br

DTAPEP - Diretoria Técnica de Apoio ao Ensino e Pesquisa

Biotério Central da Faculdade de Medicina da USP

Av. Dr. Arnaldo, 455 - Cerqueira César - São Paulo - CEP 01246-903

Fone 11 55 3061-7412

www.bioterio.fm.usp.br

AUTENTICAÇÃO DE LINHAGENS

Laudo do Perfil de STR's / STR Profile Report

INFORMAÇÃO DO CLIENTE / CUSTOMER INFORMATION

|                           |                      |
|---------------------------|----------------------|
| Nome / Name               | IRAN AMORIM DA SILVA |
| Instituição / Institution | HCFMUSP              |
| Departamento / Department | CIRURGIA             |
| Telefone / Phone          | 1130617183           |
| E-mail                    | iransilva@gmail.com  |

|                                   |                     |
|-----------------------------------|---------------------|
| Nome da Linhagem / Cell line name | DU145 (ATCC HTB-81) |
|-----------------------------------|---------------------|

|                                           |            |                              |            |
|-------------------------------------------|------------|------------------------------|------------|
| Amostra recebida em / Samples received in | 00-00-0000 | Data do laudo / Report date: | 16-12-2019 |
|-------------------------------------------|------------|------------------------------|------------|

| Loci                                                                                                                                          | Resultado do Teste / Test Result<br>(amostra/sample)     |    |    |    | Perfil da referência no Banco de Dados / Reference Database Profile |    |    |  |    |
|-----------------------------------------------------------------------------------------------------------------------------------------------|----------------------------------------------------------|----|----|----|---------------------------------------------------------------------|----|----|--|----|
|                                                                                                                                               | Perfil da Amostra / Query Profile<br>DU145 (ATCC HTB-81) |    |    |    | Perfil da referência / Database Profile<br>DU145 (ATCC HTB-81)      |    |    |  |    |
| TH01                                                                                                                                          | 7                                                        |    |    |    | 7                                                                   |    |    |  |    |
| TPOX                                                                                                                                          | 10                                                       | 11 |    |    | 11                                                                  |    |    |  |    |
| vWA                                                                                                                                           | 17                                                       | 18 |    |    | 17                                                                  | 18 | 19 |  |    |
| CSF1PO                                                                                                                                        | 10                                                       | 11 |    |    | 10                                                                  | 11 |    |  |    |
| D16S539                                                                                                                                       | 10                                                       | 11 | 13 |    | 11                                                                  | 13 |    |  |    |
| D7S820                                                                                                                                        | 7                                                        | 10 | 11 |    | 7                                                                   | 10 | 11 |  |    |
| D13S317                                                                                                                                       | 11                                                       | 12 | 13 | 14 | 12                                                                  | 13 | 14 |  |    |
| D5S818                                                                                                                                        | 10                                                       | 13 |    |    | 10                                                                  | 13 |    |  |    |
| D21S11                                                                                                                                        |                                                          |    |    |    |                                                                     |    |    |  |    |
| Amelogenin                                                                                                                                    | x                                                        | y  |    |    | x                                                                   | y  |    |  |    |
| Número de alelos iguais entre a amostra e referência / Number of shared alleles between query sample and database profile:                    |                                                          |    |    |    |                                                                     |    |    |  | 18 |
| Total de alelos na amostra referência / Total number of alleles in the database profile:                                                      |                                                          |    |    |    |                                                                     |    |    |  | 20 |
| Porcentagem de correspondência entre alelos da amostra e da referência / Percent match between the submitted sample and the database profile: |                                                          |    |    |    |                                                                     |    |    |  | 95 |

RESULTADO / RESULT

Linhagens celulares com uma porcentagem de correspondência >=80% são consideradas relacionadas, ou seja, derivada de um ancestral comum. Linhagens com porcentagem de correspondência entre 55% e 80% necessitam de novos testes (maior número de marcadores) para confirmar sua autenticidade. / Cell lines with >=80% match are considered to be related; i.e., derived from a common ancestry. Cell lines with between a 55% to 80% match require further profiling for authentication of relatedness. (ATCC - STR Profile Report)

METODOLOGIA / METHODOLOGY

10 STR's, correspondendo aos loci TH01, TPOX, vWA, CSF1PO, D16S539, D7S820, D13S317, D5S818, Amelogenin e D21S11 (GenePrint 10 / Promega), foram amplificados e submetidos à eletroforese capilar para separação dos fragmentos (3730 DNA Analyzer - Applied Biosystems). Os dados foram analisados através do software XXX GeneMaker HDI v.1.1.0 (Softgenetics LCC). Controles positivos e negativos apropriados foram utilizados na validação de cada amostra. / 10 STR's (TH01, TPOX, vWA, CSF1PO, D16S539, D7S820, D13S317, D5S818, Amelogenin and D21S11- GenePrint 10 / Promega) are co-amplified and submitted to capillary electrophoresis (3730 DNA Analyzer - Applied Biosystems). An internal lane standard (ILS) and allelic ladder are provided for sizing and genotyping of amplified fragments, and the 2800M Control DNA is supplied as a positive control (GenePrint 10 / Promega). Data is analyzed using software GeneMaker HDI v.1.1.0 (Softgenetics LCC).

INTERPRETAÇÃO DOS DADOS / INTERPRETATION OF DATA

Os resultados foram interpretados segundo as diretrizes do ANSI Standards 2011 (ASN-0002 / ATCC Standards Development Organization) / Results were interpreted as described in ANSI Standards 2011 (ASN-0002 / ATCC Standards Development Organization / ATCC STR Profile Report)

☐ A linhagem enviada para análise é de origem humana, mas o seu perfil não corresponde a nenhuma linhagem padrão presente nos bancos de dados analisados / The submitted sample profile is of human origin, but not a match for any profile in the STR database

☐ A linhagem enviada para análise corresponde exatamente à seguinte linhagem celular humana / The submitted profile is an exact match for the following human cell line(s):

☒ O perfil de marcadores da linhagem enviada é similar à(s) seguinte(s) linhagem(s) celular(es) humana(s) / The submitted profile is similar to the following ATCC human cell line(s):

DU 145 Prostate Carcinoma Human (ATCC HTB-81)

OBSERVAÇÕES / Additional Comments

[https://www.atcc.org/en/STR\\_Database.aspx](https://www.atcc.org/en/STR_Database.aspx)

Responsável Técnico: Christian Albert Merkel

Email: c.merkel@fm.usp.br

Supplementary Figure S2. Concentration and time for selecting plasmid-transfected cells with puromycin.

Control

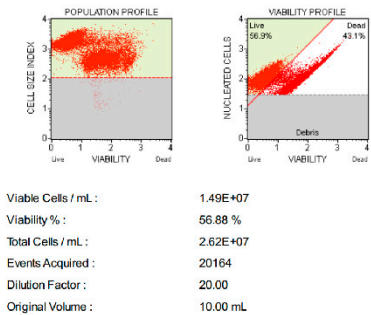

100 µg/mL

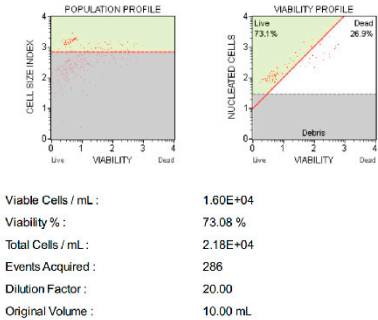

150 µg/mL

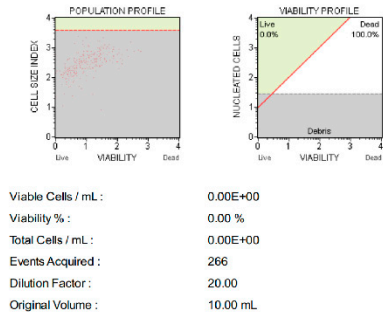

200 µg/mL

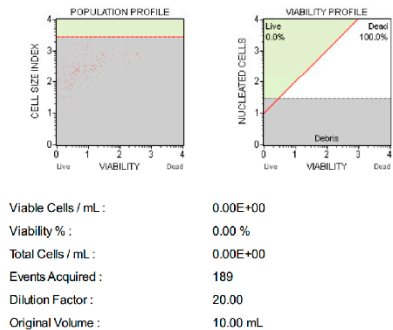

250 µg/mL

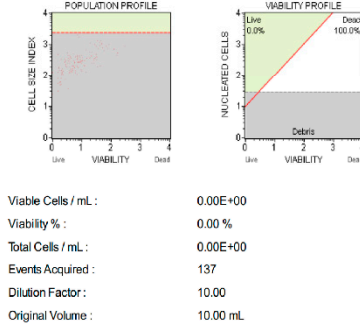

Supplementary Figure S3. Validation of plasmid transfection with GFP

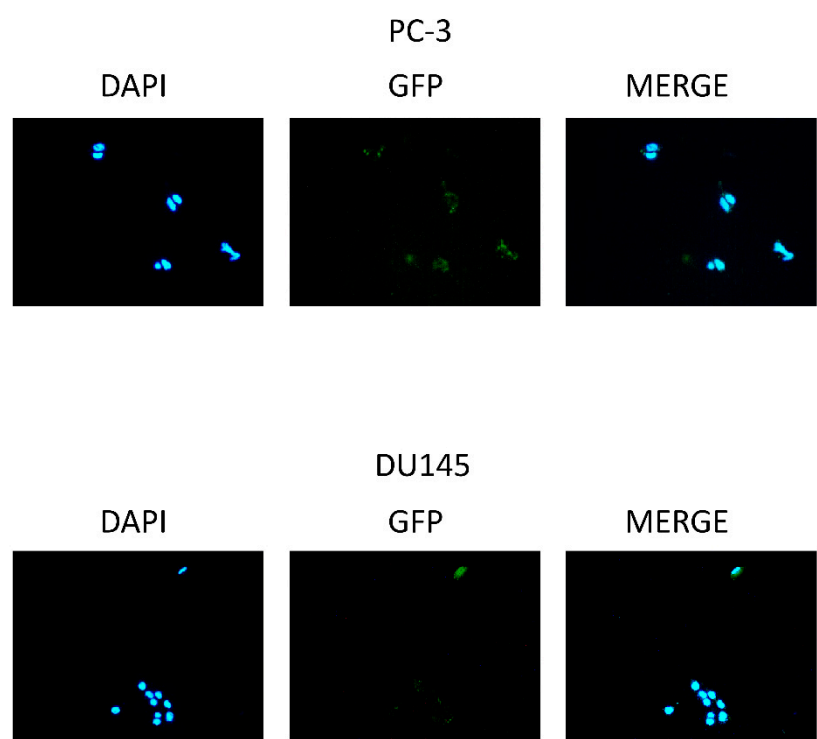

Supplementary Figure S4.

Western Blotting images

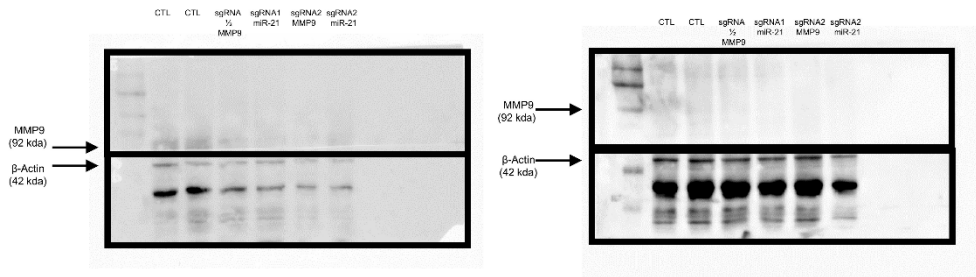

Supplement: s1 [file s1]
